# Supplementary material for: Parallel Tempering with Lasso for model reduction in systems biology
Source: PLOS journal article supplement (doi:10.1371/journal.pcbi.1007669), 2020-03-09
Supplement: S8 (10.1371/journal.pcbi.1007669.s008) [file journal.pcbi.1007669.s008]

**Table S1.** Hard constraints in the NF- $\kappa$ B signaling fits.

| Index | Constraint description                                                                                 | Constraint                                                                                |
|-------|--------------------------------------------------------------------------------------------------------|-------------------------------------------------------------------------------------------|
| 1     | Exit rate of NF- $\kappa$ B-I $\kappa$ B from the nucleus is greater than free NF- $\kappa$ B          | $ke2a > ke1$                                                                              |
| 2     | Exit rate of NF- $\kappa$ B-I $\kappa$ B from the nucleus is greater than free I $\kappa$ B            | $ke2a > ke2$                                                                              |
| 3     | IKK mediated degradation of free cytosolic I $\kappa$ B is greater than the basal rate                 | $kt1a > c4a$                                                                              |
| 4     | IKK mediated degradation of NF- $\kappa$ B bound cytosolic I $\kappa$ B is greater than the basal rate | $kt2a > c5a$                                                                              |
| 5     | At equilibrium there is some NF- $\kappa$ B in the nucleus                                             | $\frac{nNF\kappa B_{eq} + nNF\kappa B - I\kappa B_{eq}}{TotalNF\kappa B} \in [0.05, 0.5]$ |
| 6     | At least 1 TNFR molecule/cell is activated                                                             | $\min(TNFRa) > 1$                                                                         |
| 7     | At least 1 IKK molecule/cell is activated                                                              | $\min(IKKa) > 1$                                                                          |
| 8     | Equilibrium check before TNF stimulation                                                               | Rate of change for each model species $< 1e-4$ molecules/5e5 seconds                      |
